# Supplementary material for: Medium-to-Long-Term Immunogenicity of BNT162b2 mRNA COVID-19 Vaccine: A Retrospective Cohort Study
Source: MDPI journal article supplement (doi:10.3390/vaccines10030417), 2022-03-10
Supplement: s1 [file s1]

**Figure S1. Trend in the GMT (95%CI) of anti-COVID19 IgG in screened HCWs, per sex.**

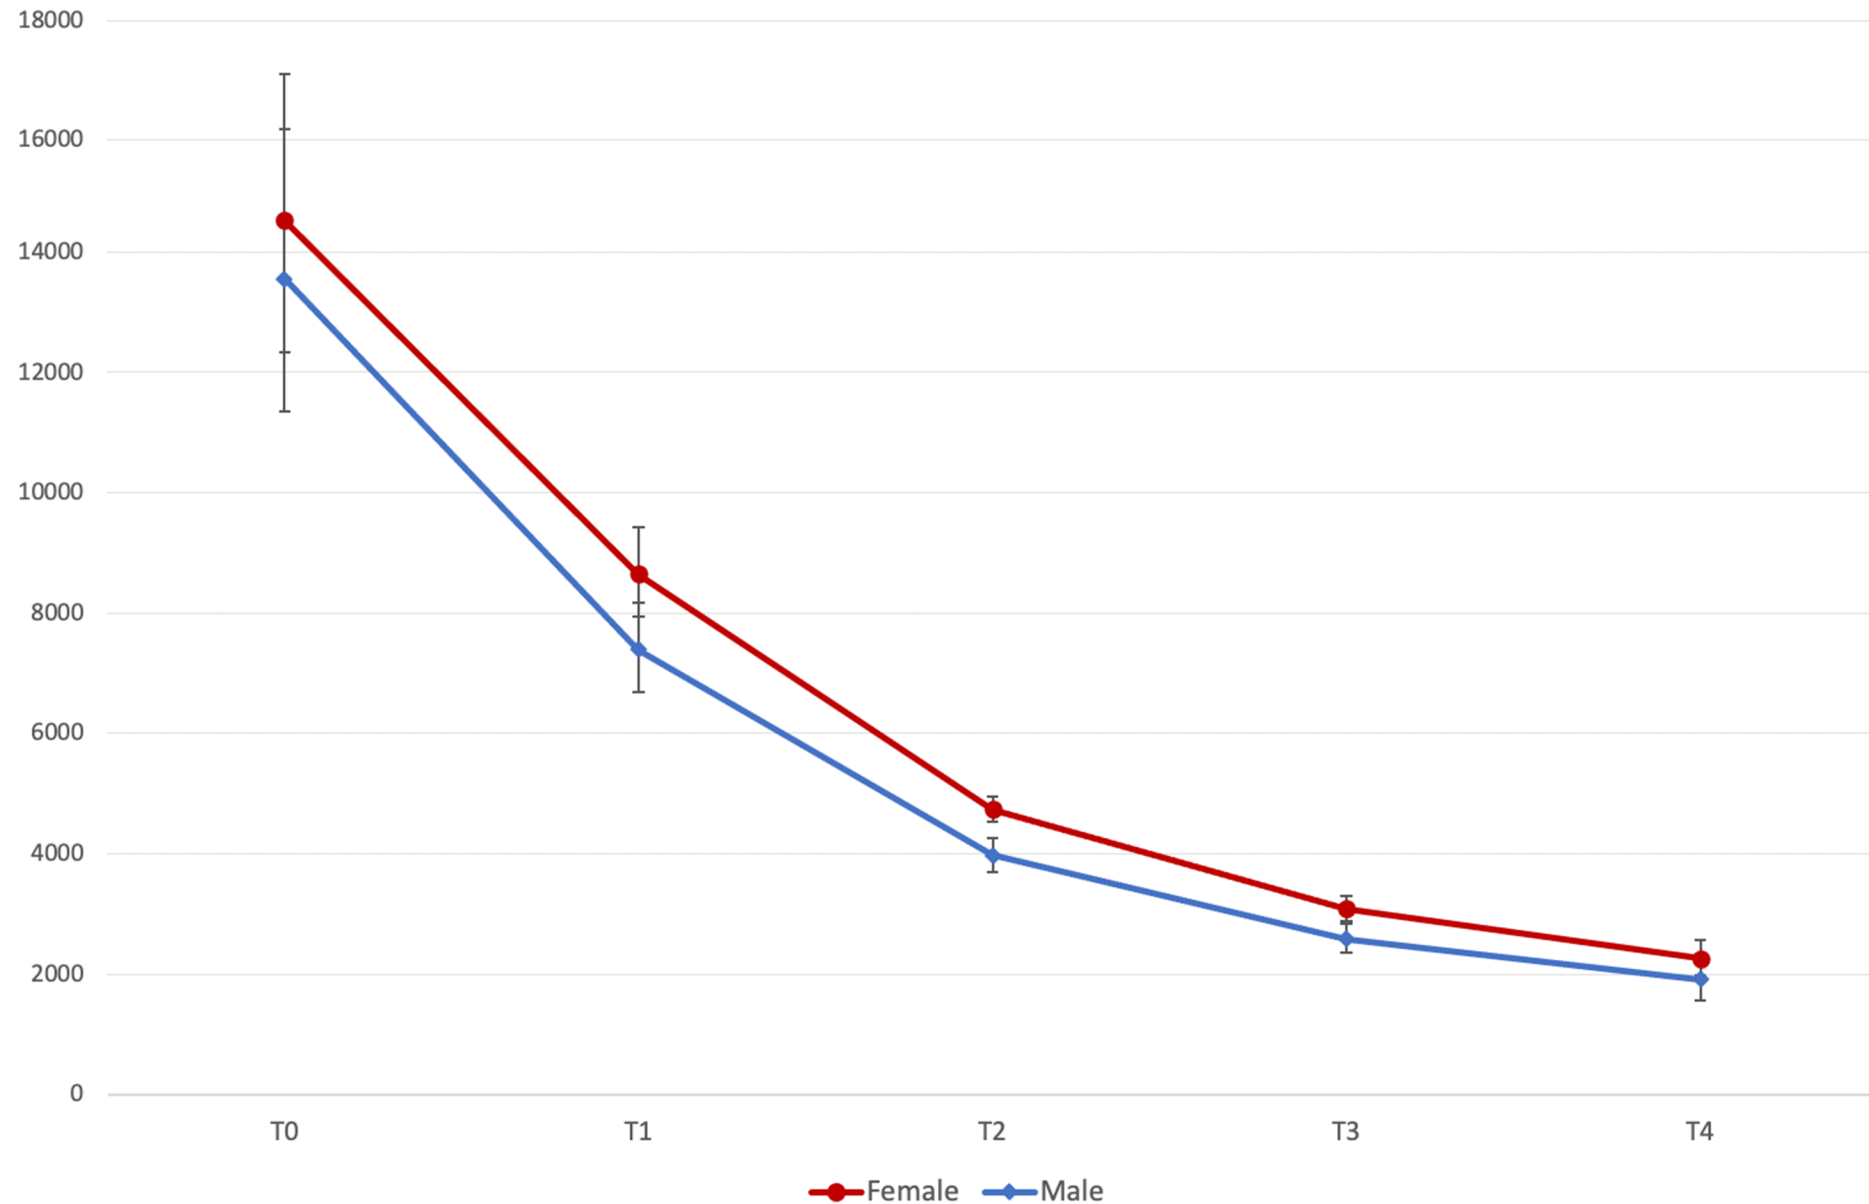

**Figure S2. Trend in the GMT (95%CI) of anti-COVID19 IgG in screened HCWs, per age class.**

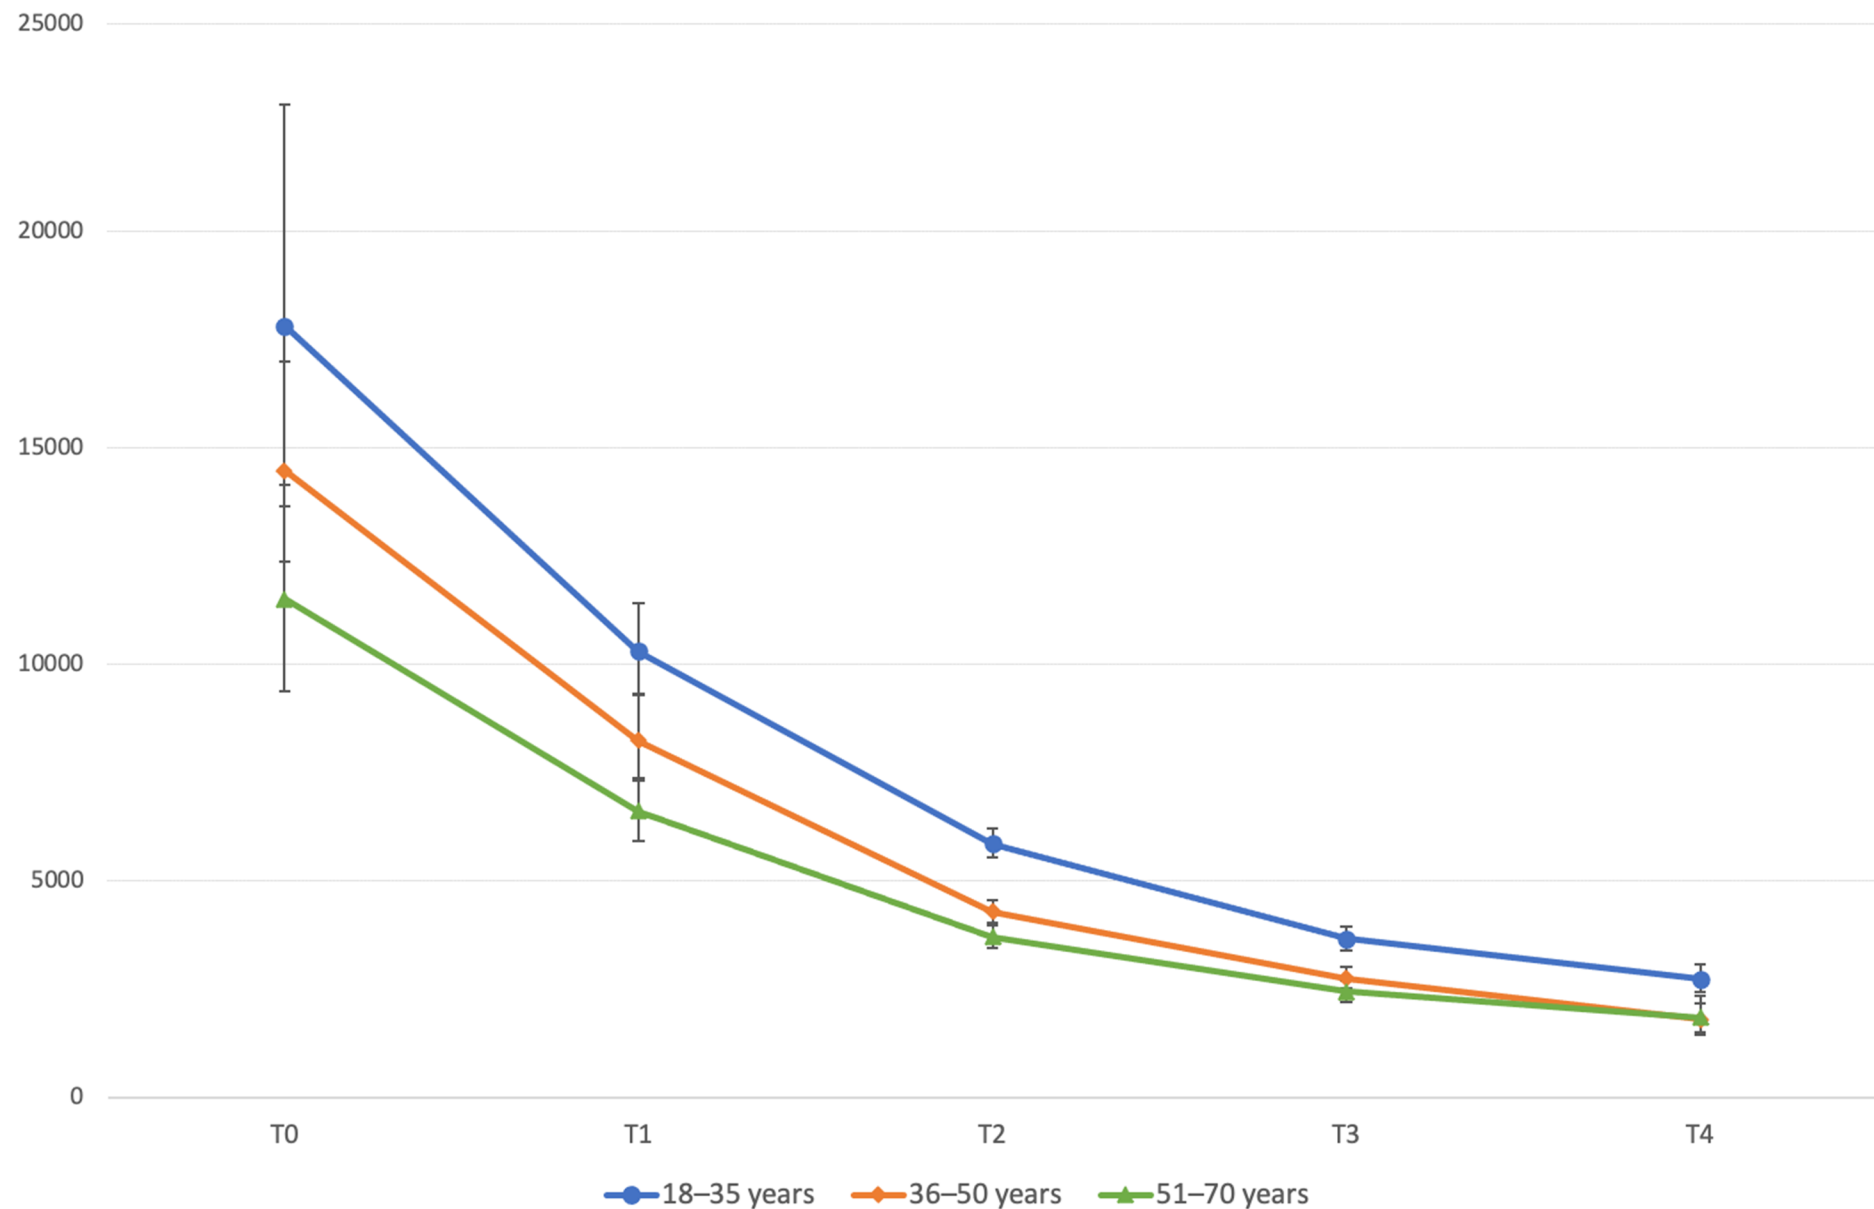

**Figure S3. Trend in the GMT (95%CI) of anti-COVID19 IgG in screened HCWs, per job type.**

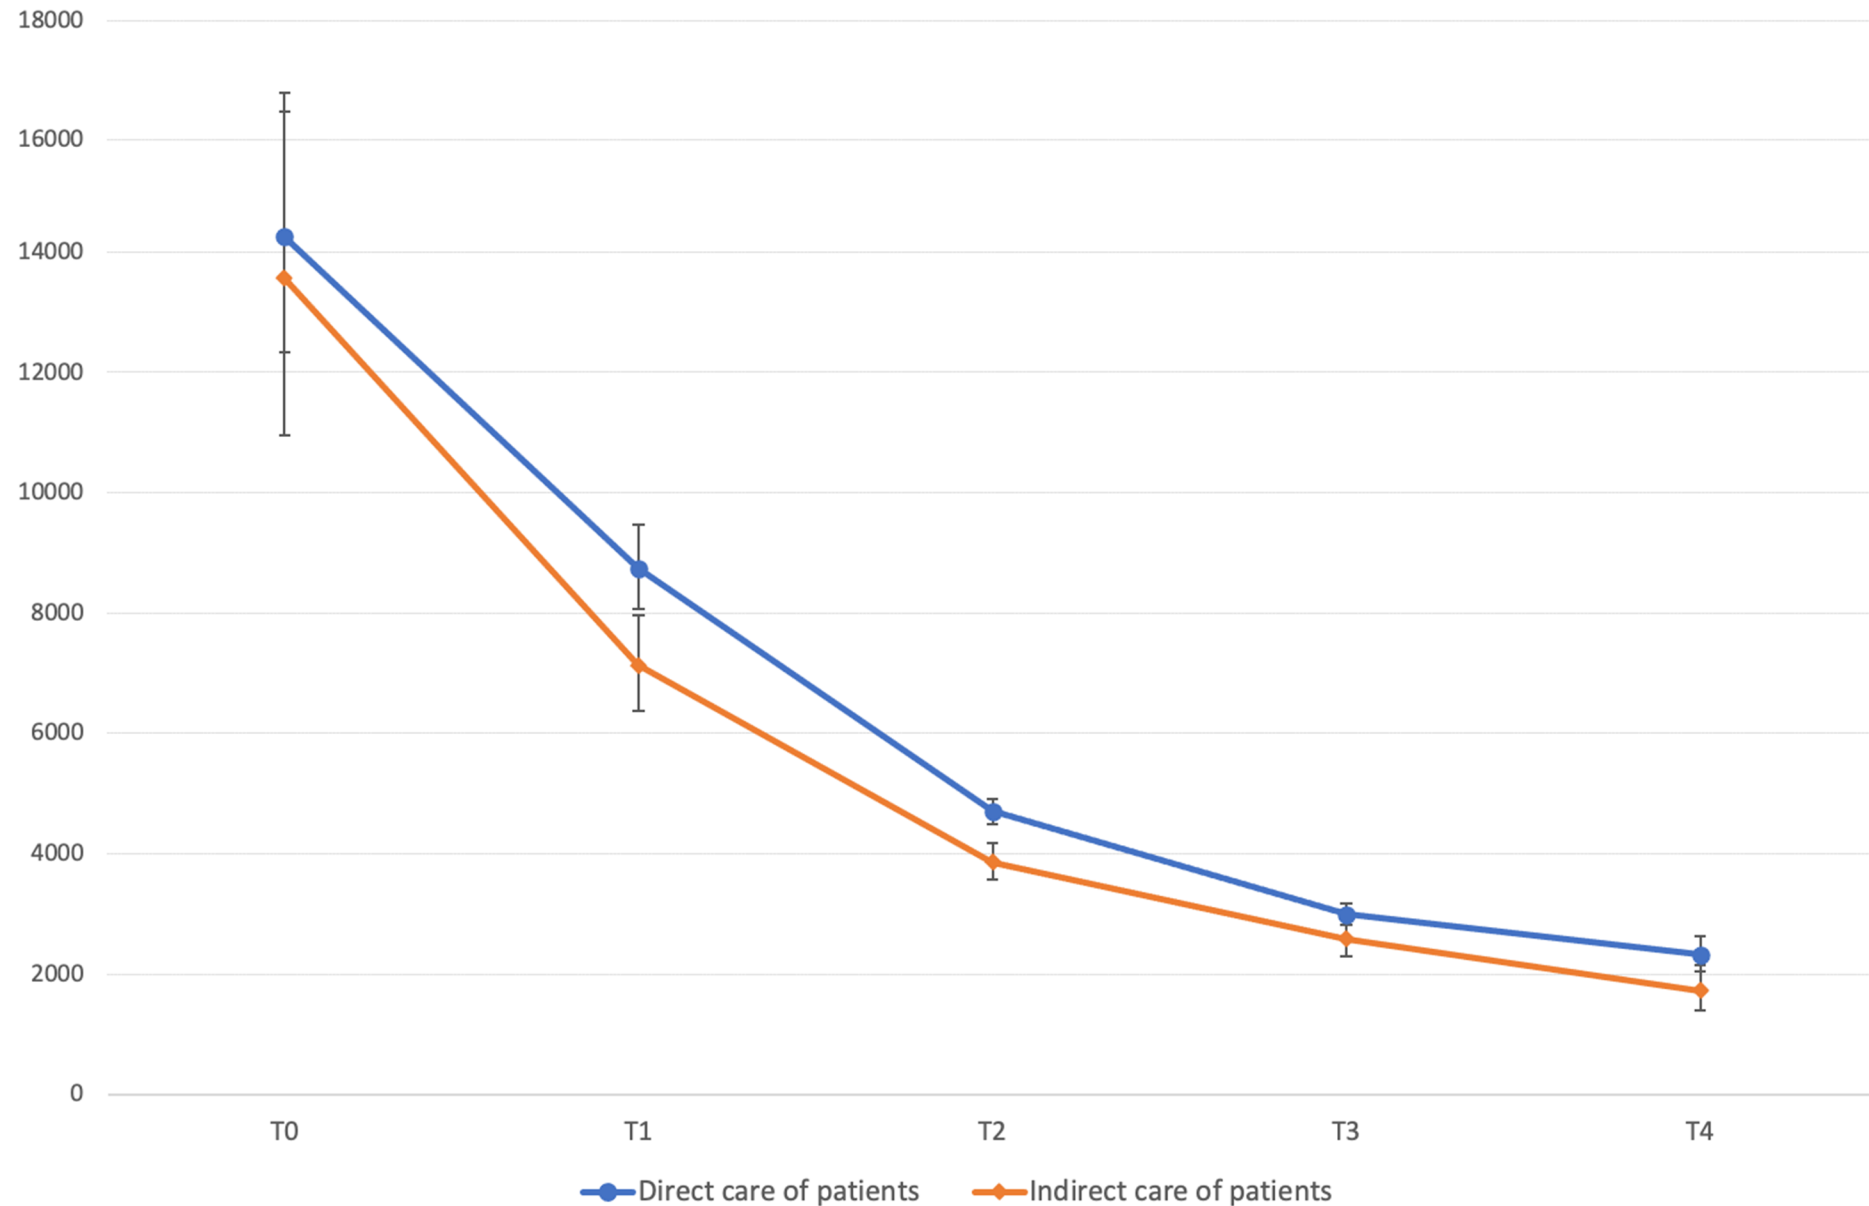

**Figure S4. Trend in the GMT (95%CI) of anti-**COVID19** IgG in screened HCWs, per ward.**

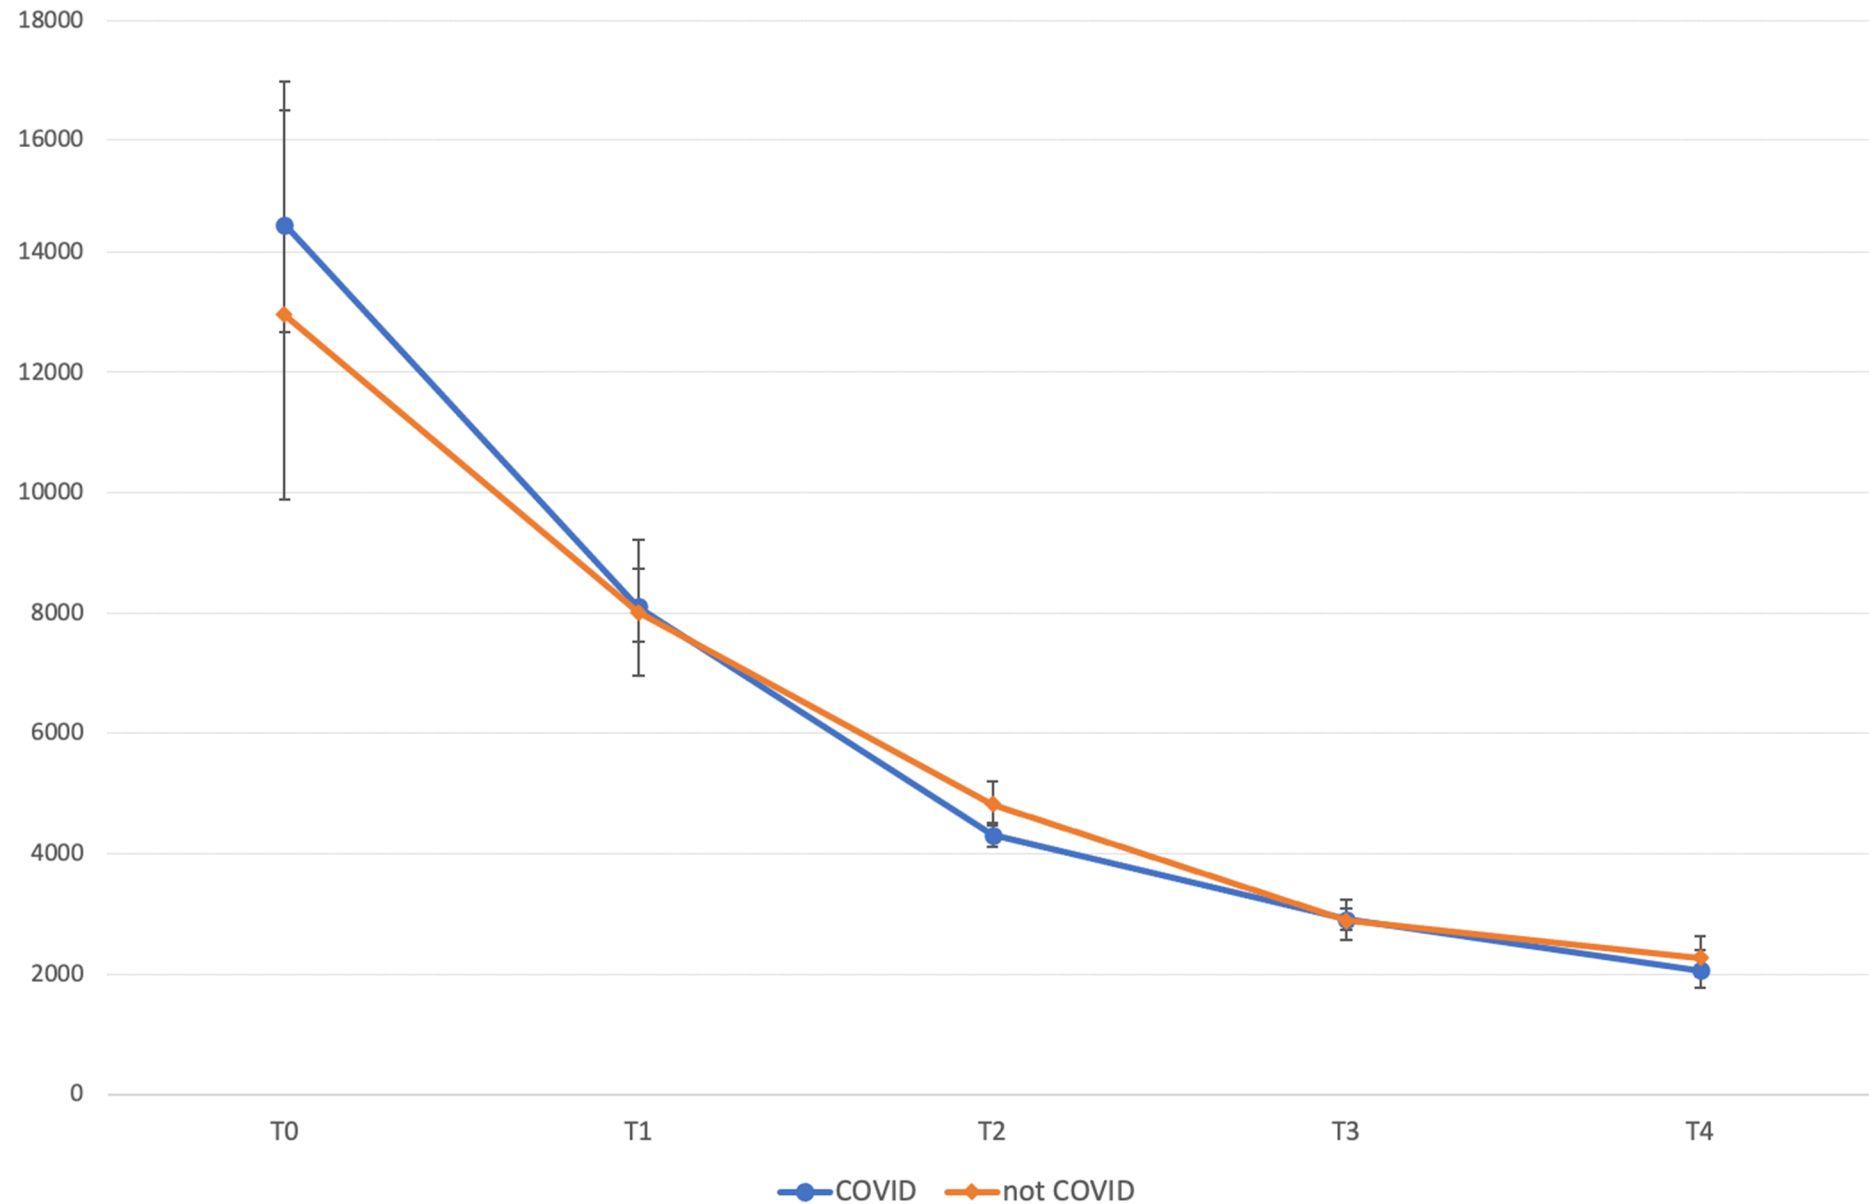

**Table S1. Tests of simple effects to explain the significant interaction between sex and time.**

|                               | Contrast  | 95% confidence interval | Standard error | p-value |
|-------------------------------|-----------|-------------------------|----------------|---------|
| <b>Group</b>                  |           |                         |                |         |
| Male vs. female               | -620.6    | -1,174.4 – -66.8        | 282.6          | 0.028   |
| <b>Time</b>                   |           |                         |                |         |
| T1 vs T0                      | -7,218.2  | -8,021.0 – -6,413.4     | 410.6          | <0.0001 |
| T2 vs. T0                     | -12,371.0 | -13,105.7 – -11,636.3   | 374.9          | <0.0001 |
| T3 vs. T0                     | -14,496.7 | -15,308.8 – 13,684.7    | 414.3          | <0.0001 |
| T4 vs. T0                     | 485.1     | -16,466.6 – -14,564.9   | 485.1          | <0.0001 |
| <b>Group×time</b>             |           |                         |                |         |
| (male vs. female)×(T1 vs. T0) | -1,659.4  | -3,268.9 – -49.8        | 821.2          | 0.043   |
| (male vs. female)×(T2 vs. T0) | -587.8    | -2,057.3 – 881.7        | 749.7          | 0.433   |
| (male vs. female)×(T3 vs. T0) | -333.9    | -1,958.0 – 1,290.1      | 828.6          | 0.687   |
| (male vs. female)×(T4 vs. T0) | -715.4    | -2,617.1 – 1,186.3      | 970.3          | 0.461   |

**Table S2. Tests of simple effects to explain the significant interaction between age class and time.**

|                                   | Contrast  | 95% confidence interval | Standard error | p-value |
|-----------------------------------|-----------|-------------------------|----------------|---------|
| <b>Group</b>                      |           |                         |                |         |
| 36–50 vs. 18–35 yrs               | -2252.5   | -2,938.6 – -1,566.4     | 350.1          | <0.0001 |
| 51–70 vs. 18–35 yrs               | -2494.9   | -3,132.2 – -1,857.5     | 325.2          | <0.0001 |
| <b>Time</b>                       |           |                         |                |         |
| T1 vs. T0                         | -7,336.5  | -8,139.5 – -6,533.6     | 409.7          | <0.0001 |
| T2 vs. T0                         | -12,574.3 | -13,307.6 – -11,841.0   | 374.1          | <0.0001 |
| T3 vs. T0                         | -14,817.7 | -15,617.6 – -14,017.8   | 408.1          | <0.0001 |
| T4 vs. T0                         | -15,747.5 | -16,675.1 – -14,819.9   | 473.3          | <0.0001 |
| <b>Group×time</b>                 |           |                         |                |         |
| (36–50 vs. 18–35 yrs)×(T1 vs. T0) | 2,264.4   | 216.2 – 4,312.5         | 1,045.0        | 0.030   |
| (36–50 vs. 18–35 yrs)×(T2 vs. T0) | 3,185.0   | 1,321.1 – 5,049.0       | 951.0          | 0.001   |
| (36–50 vs. 18–35 yrs)×(T3 vs. T0) | 4,076.3   | 2,045.5 – 6,107.0       | 1,036.1        | <0.0001 |
| (36–50 vs. 18–35 yrs)×(T4 vs. T0) | 4,092.1   | 1,740.8 – 6,443.3       | 1,199.6        | 0.001   |
| (51–70 vs. 18–35 yrs)×(T1 vs. T0) | 3,064.3   | 1,129.1 – 4,999.6       | 987.4          | 0.002   |
| (51–70 vs. 18–35 yrs)×(T2 vs. T0) | 5,070.2   | 3,277.1 – 6,6863.4      | 914.9          | <0.0001 |
| (51–70 vs. 18–35 yrs)×(T3 vs. T0) | 5,697.8   | 3,756.2 – 7,639.5       | 990.6          | <0.0001 |
| (51–70 vs. 18–35 yrs)×(T4 vs. T0) | 6,369.6   | 4,162.6 – 8,576.5       | 1,126.0        | <0.0001 |

**Table S3. Tests of simple effects to explain the significant interaction between job type (direct care vs. indirect care of patients) and time.**

|                                   | Contrast  | 95% confidence interval | Standard error | p-value |
|-----------------------------------|-----------|-------------------------|----------------|---------|
| <b>Group</b>                      |           |                         |                |         |
| Direct vs. indirect               | -870.8    | -1,463.9 – -277.7       | 302.6          | 0.004   |
| <b>Time</b>                       |           |                         |                |         |
| T1 vs. T0                         | -7,178.9  | -8,073.8 – -6,284.1     | 456.6          | <0.0001 |
| T2 vs. T0                         | -12,279.4 | -13,111.4 – -11,447.4   | 424.5          | <0.0001 |
| T3 vs. T0                         | -14,362.8 | -15,287.1 – -13,438.4   | 471.6          | <0.0001 |
| T4 vs. T0                         | -15,413.3 | -16,445.1 – -14,381.5   | 526.4          | <0.0001 |
| <b>Group×time</b>                 |           |                         |                |         |
| (Direct vs. indirect)×(T1 vs. T0) | -715.9    | -2,505.7 – 1,703.9      | 913.2          | 0.433   |
| (Direct vs. indirect)×(T2 vs. T0) | 280.1     | -1,383.9 – 1,944.1      | 849.0          | 0.741   |
| (Direct vs. indirect)×(T3 vs. T0) | 667.9     | -1,180.8 – 2,516.5      | 943.2          | 0.479   |
| (Direct vs. indirect)×(T4 vs. T0) | 142.9     | -1,920.6 – 2,206.6      | 1,052.9        | 0.892   |

**Table S4. Tests of simple effects to explain the significant interaction between wards (COVID vs. not COVID) and time.**

|                                   | Contrast  | 95% confidence interval | Standard error | p-value |
|-----------------------------------|-----------|-------------------------|----------------|---------|
| <b>Group</b>                      |           |                         |                |         |
| COVID vs. not COVID               | -25.0     | -645.8 – 595.7          | 316.7          | 0.937   |
| <b>Time</b>                       |           |                         |                |         |
| T1 vs. T0                         | -7,059.2  | -7,946.4 – -6,172.1     | 452.6          | <0.0001 |
| T2 vs. T0                         | -12,176.2 | -12,978.4 – -11,373.9   | 409.3          | <0.0001 |
| T3 vs. T0                         | -14,404.6 | -15,286.7 – -13,522.6   | 450.0          | <0.0001 |
| T4 vs. T0                         | -15,400.3 | -16,412.4 – -14,388.1   | 516.4          | <0.0001 |
| <b>Group×time</b>                 |           |                         |                |         |
| (COVID vs. not COVID)×(T1 vs. T0) | 407.8     | -1,366.5 – 2,182.2      | 905.3          | 0.450   |
| (COVID vs. not COVID)×(T2 vs. T0) | 763.2     | -841.4 – 2,367.8        | 818.7          | 0.930   |
| (COVID vs. not COVID)×(T3 vs. T0) | 470.4     | -1,293.7 – 2,234.4      | 900.0          | 0.520   |
| (COVID vs. not COVID)×(T4 vs. T0) | 263.5     | -1,760.7 – 2,287.8      | 1032.8         | 0.260   |
